CORRECTION

# Correction: A ‘Terror of Tyrannosaurs’: The First Trackways of Tyrannosaurids and Evidence of Gregariousness and Pathology in Tyrannosauridae

The *PLOS ONE* Staff

Reference 65 is a duplicate of reference 11. All citations of reference 65 in the text of the article should instead cite reference 11. All other citations and references are correct.

## Reference

McCrea RT, Buckley LG, Farlow JO, Lockley MG, Currie PJ, et al. (2014) A ‘Terror of Tyrannosaurs’: The First Trackways of Tyrannosaurids and Evidence of Gregariousness and Pathology in Tyrannosauridae. *PLoS ONE* 9(7): e103613. doi: [10.1371/journal.pone.0103613](https://doi.org/10.1371/journal.pone.0103613) PMID: [25054328](https://pubmed.ncbi.nlm.nih.gov/25054328/)

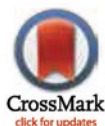

## OPEN ACCESS

**Citation:** The *PLOS ONE* Staff (2015) Correction: A ‘Terror of Tyrannosaurs’: The First Trackways of Tyrannosaurids and Evidence of Gregariousness and Pathology in Tyrannosauridae. *PLoS ONE* 10(1): e0117606. doi:10.1371/journal.pone.0117606

**Published:** January 9, 2015

**Copyright:** © 2015 The PLOS ONE Staff. This is an open access article distributed under the terms of the [Creative Commons Attribution License](https://creativecommons.org/licenses/by/4.0/), which permits unrestricted use, distribution, and reproduction in any medium, provided the original author and source are credited.
